1 **Genome-wide comparison of toxigenic and non-toxigenic *Corynebacterium diphtheriae***  
2 **isolates identifies differences in the pan genomes between respiratory and cutaneous**  
3 **strains**

4 Verlaine J Timms<sup>1\*</sup>, Trang Nguyen<sup>2</sup>, Taryn Crighton<sup>2</sup>, Marion Yuen<sup>2</sup> and Vitali  
5 Sintchenko<sup>1,2,3</sup>

6 <sup>1</sup>Centre for Infectious Diseases and Microbiology–Public Health, Westmead Hospital,  
7 Sydney, Australia

8 <sup>2</sup>Centre for Infectious Diseases and Microbiology Laboratory Services, ICPMR-Pathology  
9 West, Sydney, Australia

10 <sup>3</sup>Marie Bashir Institute for Infectious Diseases and Biosecurity, Sydney Medical School, The  
11 University of Sydney, Sydney, Australia

12 \*Corresponding author

13 Running Title: Genome-wide comparison of *C. diphtheriae*

14 Postal Address: Centre for Infectious Diseases and Microbiology, Westmead Hospital, PO  
15 Box 533 Wentworthville NSW 2145, Australia

16 Email: verlaine.timms@health.nsw.gov.au

17 Phone: +61 2 9845 9870

18 Fax: +61 2 9893 8659

19

20 **Abstract**

21 Objectives

22 *Corynebacterium diphtheriae* is the main etiological agent of diphtheria, a global disease  
23 causing life-threatening infections, particularly in infants and children. Vaccination with  
24 diphtheria toxoid protects against infection with potent toxin producing strains. However a  
25 growing number of apparently non-toxigenic but potentially invasive *C. diphtheriae* strains  
26 are identified in countries with low prevalence of diphtheria, raising key questions about  
27 genomic structures and population dynamics of the species.

28 Methods

29 This study examined genomic diversity among 47 *C. diphtheriae* isolates collected in  
30 Australia over a 10-year period using whole genome sequencing. Phylogeny was determined  
31 using SNP-based mapping and genome wide analysis.

32 Results

33 *C. diphtheriae* sequence type (ST) 32, a non-toxigenic ST with evidence of enhanced  
34 virulence that is also circulating in Europe, appears to be endemic in Australia. Isolates from  
35 temporospatially related patients displayed the same ST and similarity in their core genomes.  
36 The genome-wide analysis highlighted a role of pilins, adhesion factors and iron utilization in  
37 infections caused by toxigenic as well as non-toxigenic strains.

38 Conclusions

39 The genomic diversity of toxigenic and non-toxigenic strains of *C. diphtheriae* in Australia  
40 suggests multiple local and overseas sources of infection and colonisation. Our findings  
41 suggest that regular genomic surveillance of co-circulating toxigenic and non-toxigenic *C.*  
42 *diphtheriae* can deliver highly nuanced data in order to inform targeted public health actions  
43 and policy for predicting the future impact of this highly successful pathogen.

44

## 45 **Introduction**

46 Diphtheria was the number one cause of infant death prior to the introduction of toxoid  
47 vaccines and since this time, infection with *Corynebacterium diphtheriae*, the causative agent  
48 of diphtheria, has been a rare challenge in the developed world (1). Toxin-negative isolates of  
49 *C. diphtheriae* have been revealed to be associated with prosthetic and native valve  
50 endocarditis and significantly, have been increasingly detected in clinical samples (2, 3). This  
51 emerging increase is thought to be due to the uptake of matrix-assisted laser  
52 desorption/ionisation time-of-flight mass spectrometry (MALDI-TOF MS) identification, but  
53 the scenario is unclear. The growing numbers of apparently non-toxigenic but potentially  
54 invasive *C. diphtheriae* isolates identified by diagnostic and public health laboratories in  
55 countries with low prevalence of diphtheria raises concerns about other virulence factors and  
56 population dynamics of the species. Since the publication of the first complete genome  
57 sequence of *C. diphtheriae* (4) the phylogeographical structure of this species and the role of  
58 iron-uptake systems, adhesions and fimbrial proteins in virulence have become key questions  
59 that need addressing (5). Furthermore, the re-emergence of potent toxigenic variants may  
60 emerge from local strains being lysogenized by a toxin gene carrying corynebacteriophage  
61 (6).

62 The most virulent *C. diphtheriae* are those that possess the toxin gene and produce diphtheria  
63 toxin (DT), one of the most potent exotoxins known. In order for *C. diphtheriae* to produce  
64 DT it must be lysogenized with corynebacteriophages carrying the DT gene (*tox*). The two  
65 most common bacteriophages known to infect *C. diphtheriae* are corynephage  $\beta$  and  $\omega$ .  
66 However corynebacteriophages from *C. ulcerans* can also carry *tox* gene homologs and it  
67 remains unknown whether bacteriophages of *C. ulcerans* can lysogenize *C. diphtheriae* (7).  
68 In addition, very little is known whether other toxin gene variants exist and the role that other  
69 *C. diphtheriae* pathogenic factors may play. Toxin production is regulated by a repressor on

70 the bacterial chromosome, DtxR in response to the amount of free iron available in the local  
71 environment (8). DtxR is also responsible for the regulation of a wide range of other genes  
72 used for colonisation, nutrient acquisition and persistence and has been shown to vary among  
73 strains (9). Such factors involved in iron metabolism and virulence determinants such as pili  
74 may also vary among strains and contribute to the success of certain clones (10).

75 The advancement of whole genome sequencing has led to revolutionary change for  
76 public health laboratory surveillance, opening up the potential to describe outbreaks in high  
77 resolution and to explore potential transmission routes (7, 8). The aim of this study was to  
78 examine genomic variation among *C. diphtheriae* isolates identified in the most populous  
79 state of Australia and referred to our laboratory for diphtheria toxin testing over a 10 year  
80 period. We examined whether *C. diphtheriae* transmission has been occurring locally and  
81 whether recent strains contained toxin homologs undetectable with existing assays. We also  
82 investigated if other pathogenic factors such as pili variation were contributing to possible  
83 local transmission.

## 84 **Methods**

85 ***Bacterial isolates and molecular subtyping.*** All *C. diphtheriae* clinical isolates collected  
86 between January 2004 and January 2016 by the public health reference laboratory at the  
87 Centre for Infectious Diseases and Microbiology, Pathology West, Westmead Hospital were  
88 included in the study. They were cultured on horse blood agar and incubated aerobically at  
89 37°C. Bacterial isolates were identified as *C. diphtheriae* based on MALDI-TOF (cut-off 2.2)  
90 and the biotype determined biochemically using the API® Coryne Strip (API bioMérieux).  
91 Toxin studies were carried out using the modified Elek test (11) and PCR for the diphtheria  
92 toxin gene (12).

93 **DNA extraction and whole genome sequencing (WGS).** Genomic DNA was extracted from  
94 pure cultures using the DNeasy Blood & Tissue Kit (QIAGEN). Type strains *C. diphtheriae*  
95 ATCC 27010 (C7(-)) and ATCC 13812 (PW8) were included for comparison of assembly  
96 and typing pipelines. Paired-end indexed libraries of 150bp in length were prepared from an  
97 input of 1 ng of purified DNA with the Nextera XT kit (Illumina) as per manufacturer's  
98 instructions. DNA libraries were then sequenced using the NextSeq 500 Instrument  
99 (Illumina).

100 **Genome assembly and analysis.** The quality of the sequence data was assessed using  
101 FastQC. Sequencing reads were assembled with Spades (13) and annotated with Prokka (14).  
102 Multiple locus sequence typing (MLST) was performed with seven loci by uploading  
103 assembled fasta sequences to the PubMLST *Corynebacterium diphtheriae* database  
104 (<http://pubmlst.org/cdiphtheriae/>). In addition, pangenome assessment and visualisation was  
105 performed using Roary (15) including alignment using MAFFT (Katoh, Misawa, Kuma, &  
106 Miyata, n.d.) and tree building with FastTree (Price et al., 2010).

107 To identify SNPs, fastq files were imported into Genious (8.0.4) and mapped to the reference  
108 *C. diphtheriae* NCTC 13129 using the bwa plugin (version 0.7.10). Quality based variant  
109 detection was performed using CLC Genomics Workbench v.7.0 (CLC bio Aarhus,  
110 Denmark). Variant detection thresholds were set for a minimum coverage of 10 and  
111 minimum variant frequency of 75%. SNPs were excluded if they were in regions with a  
112 minimum fold coverage of <10, within 10-bp of another SNP or <15-bp from the end of a  
113 contig. Maximum likelihood phylogenetic trees were constructed from SNP matrices using  
114 the GTR model with 100 bootstrap replications.

115 Antibiotic resistance was predicted using ResFinder (16). BLAST comparisons to  
116 search for toxin homologs was performed with the following toxin homologs: Corynephage  
117 beta A and B subunit (NCBI accession number P00588), Corynephage omega Diphtheria  
118 toxin (accession number P00587), Corynephage beta Diphtheria toxin homolog (accession

119 number P00589) and *C. ulcerans* Diphtheria toxin homologs (accession number Q6YIX9 and  
120 Q5IL09). The homology of *dtxR* and all the genes from the Spa pilus clusters (A, D &H) was  
121 also determined using the BLAST suite with orthologs defined as those that had at least 50%  
122 length compared to corresponding gene in NCTC13129. The genomic data have been  
123 deposited in the NCBI Sequence Read Archive (SRA)  
124 (<http://www.ncbi.nlm.nih.gov/Traces/sra/>) under accession number (XXXX).

## 125 **Results**

126 Forty seven isolates were included in the study. They were recovered from patients between  
127 2004 and 2016 with 36 of these collected in 2014-2016. Three isolates were toxigenic (all  
128 biovar. *mitis*) and identified in 2015 (Table 1). The genome size was in the range of 2.2-2.7  
129 Mb with an average G+C ratio of 53%. MLST typing revealed that some isolates shared the  
130 same or had similar sequence type (ST). Core genome analysis on *de novo* assembled  
131 genomes identified 1384 core genes, 354 ‘soft core’ genes (present between 95% - 99% of  
132 strains), 888 ‘shell genes’ (present in 15%-95% of strains), 5177 cloud genes (present  
133 between 0-15% of strains) and a total pangenome of 7803 genes. Only those strains that were  
134 known to be toxin positive (5007, 2562 and 2767B) demonstrated the toxin gene or any  
135 homologs by BLAST. No variability was observed in the *dtxR* gene for any strain in this  
136 study.

137 Four out of six clusters appeared to be geographically linked (Figure 1). Cluster 1  
138 contained strains 2686, 4218, 4447 and 4526/4711 (from the same patient). This cluster had  
139 the *in silico* MLST profile for ST32; *atpA*-3, *dnaE*-1, *dnaK*-18, *fusA*-4, *leuA*-13, *odhA*-3,  
140 *rpoB*-5, with the exception of strains 4526/4711 that differed by one nucleotide (C to T) in  
141 the *dnaK* locus (Table 1 and Supplementary table 1). All isolates were from respiratory  
142 samples of adult patients residing in the same region.

143           Analysis of the pangenome showed that cluster 1 contained unique genes denoted by I  
144   and II (Figure 2). The first (I) were mainly hypothetical proteins however two were annotated  
145   as transposable elements, one ATPase and a modification methylase that was not found in  
146   any other isolates in this study (Figure 2). An additional 11 genes (II) were also unique and  
147   mostly hypothetical but again contained transposons, unique putative outer membrane  
148   proteins and phanazine biosynthesis protein (PhzF family). Analysis of SpaA, SpaD and  
149   SpaH pilus gene clusters showed that all were present in this cluster, even though the SpaD  
150   gene cluster had low homology to the reference strain (Figure 1).

151           Cluster 2 consisted of two related isolates. The first isolate 2379 was ST259 (*atpA*-3,  
152   *dnaE*-1, *dnaK*-12, *fusA*-1, *leuA*-42, *odhA*-16, *rpoB*-31), while isolate 4455 differed by one  
153   nucleotide in the *dnaK* locus. Both isolates were predicted to be resistant to Phenicol,  
154   Sulphonamide and Tetracycline. Pangenome analysis showed that the two isolates from this  
155   cluster contained the *tetO* gene predicting resistance to tetracycline (III Figure 2). This cluster  
156   did not contain the *spaE* or *spaF* gene and had variable homology in SpaH (Figure 1).

157           Cluster 3 consisted of isolates 4809 and 0993 and both isolates were from teenage  
158   males. No geographic link was determined. Pangenome analysis did not show any unique  
159   genes common to both strains. Like cluster 2, strains from this cluster did not contain the  
160   *spaF* gene and had variable homology in *both* SpaD and SpaH (Figure 1).

161           Cluster 4 was represented by isolates 4867 and 4179 from two patients (both the same  
162   age) of the same address. The two isolates represented a new ST (*atpA*-13, *dnaE*-2, *dnaK*-32,  
163   *fusA*-33, *leuA*-no match, *odhA*-1, *rpoB*-21). These strains had two regions of genes that were  
164   unique. The first region (VI) was a phage and the second (VII) contained genes for a fimbrial  
165   subunit type 1 as well as sulphur carrying protein (ThiS), inner membrane transporter protein  
166   (RhIA) and VRR-NUC domain protein to name a few. All three Spa pilus gene clusters were

167 highly variable in this cluster and did not have significant homology with the reference  
168 NCTC 13129 (Figure 1).

169 In the fifth cluster, isolates 4491, 4650 and 1138 represented a new ST with identical  
170 loci. All isolates were from males (age range 20-88 years). No markers of antibiotic  
171 resistance were observed and no unique genes were identified in this cluster. Similar to  
172 cluster 4, all three Spa pilus gene clusters were highly variable in this cluster and did not have  
173 significant homology with the reference NCTC 13129 (Figure 1).

174 Cluster 6 consisted of isolates 257 and 5117 and no antibiotic resistance genes were  
175 recorded. Pangenomic analysis (Figure 2, V) demonstrated unique genes for these two strains  
176 that contained *sdpA* and *sdpB*, both sporulation-delaying proteins, an integrase, von  
177 Willebrand factor type A domain protein and a putative transposon Tn552, all of which were  
178 shown to be part of a non-ribosomal peptide/ polyketide synthase cluster unique to these  
179 strains. In addition, these strains contained a large NRPS cluster with homologs to *mbtB*, *irtA*  
180 and *irtB*, genes known for iron regulation and survival in *M. tuberculosis* (17).

181 Interestingly, NRPS/PKS clusters contained small variations among strains, however  
182 most notable was an additional gene present in the Type 1 PKS cluster that was present in  
183 strains associated with systemic and cutaneous infections and was absent in respiratory  
184 isolates. This protein was annotated as a putative collagen binding protein and showed high  
185 homology (89-94% ) to similar proteins in *C. diphtheriae* isolates from cutaneous infections  
186 but low homology (<84%) in respiratory strains (Figure 3).

187 Genome-wide comparison of isolates also uncovered concurrent infection in one  
188 patient with two genomically distinct strains of *C. diphtheriae*. The first isolate 2767A was  
189 toxin gene PCR negative and biotype *gravis* while the second isolate 2767B was toxigenic



190 and biotype *mitis* (Table 1). The isolates were not related to each other according to the  
191 analysis employed in this study (Figures 1 and 2).

192

## 193 Discussion

194 This is the first report describing the epidemiology of toxigenic and non-toxigenic *C.*  
195 *diphtheriae* in Australia. Apart from the clusters described above, most strains represented  
196 very diverse STs reflecting multiple sources of infection including overseas-acquired cases.  
197 There is little data on the evolution of *C. diphtheriae*, particularly on current *tox<sup>+</sup>* strains. We  
198 investigated the variability of genomes of toxigenic and non-toxigenic strains of *C.*  
199 *diphtheriae* using a set of isolates collected over the last 12 years in NSW, Australia. While  
200 the number of notifiable cases has remained low during this period, the number of isolates  
201 referred to our laboratory for diphtheria toxin testing has risen remarkably with 36 of the 47  
202 isolates collected in 2014-2016. This has also been reported by other developed countries and  
203 like this study, most isolates are found to be non-toxigenic (18).

204 This study adds important insights into the evolution of *C. diphtheriae*, particularly on  
205 current *tox<sup>+</sup>* strains in countries with high uptake of diphtheria toxoid vaccines. As  
206 immunisation is achieved using vaccine containing diphtheria toxoid, it does not confer  
207 immunity to non-toxigenic strains. Infection with non-toxigenic *C. diphtheriae* can still result  
208 in respiratory, cutaneous or invasive infections (1, 19) with the cutaneous route speculated to  
209 be the more efficient in transmission (20). Proposed risk factors for infection with non-  
210 toxigenic strains of *C. diphtheriae* are intravenous drug use, alcoholism and the presence of  
211 bone or joint infections, however this is not always the case (21). Furthermore, our findings  
212 highlight a potential role of pilins, adhesion factors and iron utilization in infections caused  
213 by toxigenic as well as non-toxigenic strains.

214 The investigation of population structure using traditional MLST profiling, SNP-  
215 based mapping of raw reads and pangenome analysis has identified apparent clusters of cases  
216 of infection and indicated local acquisition of *C. diphtheriae*. For example, ST32, a ST

217 suspected to have enhanced virulence, was found in four patients. All patients found to have  
218 ST32 were from the same region and had a similar age range (16-27). ST32 has been reported  
219 previously and the success of this clone is thought to be due to its superior adherence  
220 properties (22). The adhesion rate for ST32 was found to be  $7.34 \pm 2.33\%$ , compared to other  
221 *tox*<sup>+</sup> *C. diphtheriae* strains that have an adhesion rate of  $0.34 \pm 0.05\%$  (23). We therefore  
222 examined the pilus gene clusters of our ST32 isolates and reconfirmed that the ST32 strains  
223 contained the SpaA, SpaD and SpaH pilus gene clusters although the ST32 isolated in our  
224 study had poor homology to SpaD from NCTC 13139. The pilus genes clusters are essential  
225 for the establishment of infection, particularly in the respiratory tract, and are contained on a  
226 pathogenicity island in *C. diphtheriae* (23). They are also known to vary between strains and  
227 possibly contribute to the success of certain clones. SpaA type pili are involved in adhesion to  
228 pharyngeal epithelial cells while SpaD and SpaH interact with laryngeal and lung epithelium  
229 and are highly heterogeneous across strains (5). Loss of *srtA* and/or genes from *spaB* or *spaC*  
230 (all from the SpaA pilus gene cluster) equates to loss of adhesion (24). Interestingly, Cluster  
231 1 was the only cluster that contained all three pilus gene clusters and all strains were  
232 recovered from patients with respiratory disease.

233         Antibiotic resistance in *C. diphtheriae* remains relatively uncommon, however, a  
234 recent report (25) found that *C. diphtheriae* isolates showed a decreased susceptibility to  
235 penicillin and resistance to tetracycline in Rio de Janeiro (25). Multidrug resistant isolates  
236 involved in cutaneous and respiratory diphtheria have also been described (26, 27). Further  
237 studies have found penicillin resistance to contribute to treatment failure (28). Our findings  
238 suggest that antibiotic resistance is uncommon among *C. diphtheriae* in Australia. Only  
239 isolates from Cluster 2 appeared to carry the *tetO* gene, encoding a protein which protects the  
240 ribosome from the translation inhibition action of tetracycline.

241           The emerging role of siderophores as important virulence factors of *C. diphtheriae*,  
242 deserves special attention. Iron acquisition mechanisms in pathogenic bacteria are known to  
243 contribute to survival under “nutritional immunity” a mechanism induced by the host to  
244 reduce pathogen cell replication and growth (29). Siderophores are encoded by large non-  
245 ribosomal peptide clusters known as NRPS/PKS clusters which confer survival ability in  
246 nutrient variable conditions, particularly in establishing and maintaining infection. We  
247 demonstrated variability in the siderophore clusters between the STs. Interestingly, some  
248 strains contained an additional gene encoding for a collagen binding protein that had high  
249 homology among strains isolated from cutaneous or blood infections but low homology  
250 (<84%) among strains isolated from respiratory infections. The contribution of collagen  
251 binding protein (in combination with an increase in adherence mechanisms) to the success of  
252 particular toxin-negative strains warrants further study.

253           In conclusion, the genomic diversity of toxigenic and non-toxigenic strains of *C.*  
254 *diphtheriae* in Australia suggests multiple local and overseas sources of infection and  
255 colonisation. Core and accessory genomes of *C. diphtheriae* strains colonising different  
256 ecological niches have significant differences and virulence mechanisms that modulate their  
257 fitness as pathogens. Given the growing numbers of *C. diphtheriae* isolates being identified  
258 in diagnostic laboratories it becomes essential to closely monitor non-toxigenic strains of *C.*  
259 *diphtheriae*. The findings of additional phage or virulence factors conferring advantage on  
260 *tox<sup>-</sup>* strains of *C. diphtheriae* can be of public health concern as a vaccinated population  
261 would have no immunity to new strains given vaccination immunises against the diphtheria  
262 toxoid only.

263

## 264 Acknowledgments

265 The authors wish to thank Neisha Jeffreys and the Pathogen Genomics Team at the Centre  
266 for Infectious Diseases and Microbiology. Funding from Population Health and Health  
267 Services Research Support Program, Round 4, NSW Health, Australia.

## 268 Transparency Declaration

269 The authors are aware of no relationships/conditions/circumstances that present a potential  
270 conflict of interest.

## 271 References

- 272 1. Adler NR, Mahony A, Friedman ND. Diphtheria: forgotten, but not gone. *Intern Med*  
273 *J.* 2013;43(2):206-10.
- 274 2. Belko J, Wessel DL, Malley R. Endocarditis caused by *Corynebacterium diphtheriae*:  
275 case report and review of the literature. *The Pediatric infectious disease journal.*  
276 2000;19(2):159-63.
- 277 3. Doyle CJ, Mazins A, Graham RMA, Fang N-X, Smith HV, Jennison AV. Sequence  
278 Analysis of Toxin Gene-Bearing *Corynebacterium diphtheriae* Strains, Australia. *Emerging*  
279 *infectious diseases.* 2017;23(1):105-7.
- 280 4. Cerdeno-Tarraga AM, Efstratiou A, Dover LG, Holden MT, Pallen M, Bentley SD, et  
281 al. The complete genome sequence and analysis of *Corynebacterium diphtheriae*  
282 NCTC13129. *Nucleic Acids Res.* 2003;31(22):6516-23.
- 283 5. Broadway MM, Rogers EA, Chang C, Huang IH, Dwivedi P, Yildirim S, et al. Pilus  
284 gene pool variation and the virulence of *Corynebacterium diphtheriae* clinical isolates during  
285 infection of a nematode. *J Bacteriol.* 2013;195(16):3774-83.
- 286 6. Mokrousov I. *Corynebacterium diphtheriae*: genome diversity, population structure  
287 and genotyping perspectives. *Infect Genet Evol.* 2009;9(1):1-15.
- 288 7. Meinel DM, Margos G, Konrad R, Krebs S, Blum H, Sing A. Next generation  
289 sequencing analysis of nine *Corynebacterium ulcerans* isolates reveals zoonotic transmission  
290 and a novel putative diphtheria toxin-encoding pathogenicity island. *Genome Med.*  
291 2014;6(11):113.
- 292 8. Meinel DM, Kuehl R, Zbinden R, Boskova V, Garzoni C, Fadini D, et al. Outbreak  
293 investigation for toxigenic *Corynebacterium diphtheriae* wound infections in refugees from  
294 Northeast Africa and Syria in Switzerland and Germany by whole genome sequencing. *Clin*  
295 *Microbiol Infect.* 2016.
- 296 9. Trost E, Ott L, Schneider J, Schroder J, Jaenicke S, Goesmann A, et al. The complete  
297 genome sequence of *Corynebacterium pseudotuberculosis* FRC41 isolated from a 12-year-  
298 old girl with necrotizing lymphadenitis reveals insights into gene-regulatory networks  
299 contributing to virulence. *BMC Genomics.* 2010;11:728.

- 300 10. Puliti M, von Hunolstein C, Marangi M, Bistoni F, Tissi L. Experimental model of  
301 infection with non-toxigenic strains of *Corynebacterium diphtheriae* and development of  
302 septic arthritis. J Med Microbiol. 2006;55(Pt 2):229-35.
- 303 11. Engler KH, Glushkevich T, Mazurova IK, George RC, Efstratiou A. A modified Elek  
304 test for detection of toxigenic corynebacteria in the diagnostic laboratory. Journal of clinical  
305 microbiology. 1997;35(2):495-8.
- 306 12. C M, M RR, A LJ, editors. Determination of toxigenicity of *Corynebacterium*  
307 *diphtheriae* by PCR. ASM Australia; 1994; Perth, WA, Australia: Australian Society for  
308 Microbiology.
- 309 13. Bankevich A, Nurk S, Antipov D, Gurevich AA, Dvorkin M, Kulikov AS, et al.  
310 SPAdes: a new genome assembly algorithm and its applications to single-cell sequencing. J  
311 Comput Biol. 2012;19(5):455-77.
- 312 14. Seemann T. Prokka: rapid prokaryotic genome annotation. Bioinformatics.  
313 2014;30(14):2068-9.
- 314 15. Page AJ, Cummins CA, Hunt M, Wong VK, Reuter S, Holden MT, et al. Roary: rapid  
315 large-scale prokaryote pan genome analysis. Bioinformatics. 2015;31(22):3691-3.
- 316 16. Zankari E, Hasman H, Cosentino S, Vestergaard M, Rasmussen S, Lund O, et al.  
317 Identification of acquired antimicrobial resistance genes. J Antimicrob Chemother.  
318 2012;67(11):2640-4.
- 319 17. Ratledge C, Dover LG. Iron metabolism in pathogenic bacteria. Annu Rev Microbiol.  
320 2000;54:881-941.
- 321 18. Wren MW, Shetty N. Infections with *Corynebacterium diphtheriae*: six years'  
322 experience at an inner London teaching hospital. Br J Biomed Sci. 2005;62(1):1-4.
- 323 19. Efstratiou A, Tiley SM, Sangrador A, Greenacre E, Cookson BD, Chen SC, et al.  
324 Invasive disease caused by multiple clones of *Corynebacterium diphtheriae*. Clinical  
325 infectious diseases : an official publication of the Infectious Diseases Society of America.  
326 1993;17(1):136.
- 327 20. Romney MG, Roscoe DL, Bernard K, Lai S, Efstratiou A, Clarke AM. Emergence of  
328 an invasive clone of nontoxigenic *Corynebacterium diphtheriae* in the urban poor population  
329 of Vancouver, Canada. Journal of clinical microbiology. 2006;44(5):1625-9.
- 330 21. Zasada AA. Nontoxigenic highly pathogenic clone of *Corynebacterium diphtheriae*,  
331 Poland, 2004-2012. Emerging infectious diseases. 2013;19(11):1870-2.
- 332 22. Sangal V, Blom J, Sutcliffe IC, von Hunolstein C, Burkovski A, Hoskisson PA.  
333 Adherence and invasive properties of *Corynebacterium diphtheriae* strains correlates with the  
334 predicted membrane-associated and secreted proteome. BMC Genomics. 2015;16:765.
- 335 23. Ott L, Holler M, Rheinlaender J, Schaffer TE, Hensel M, Burkovski A. Strain-specific  
336 differences in pili formation and the interaction of *Corynebacterium diphtheriae* with host  
337 cells. BMC Microbiol. 2010;10:257.
- 338 24. Mandlik A, Swierczynski A, Das A, Ton-That H. *Corynebacterium diphtheriae*  
339 employs specific minor pilins to target human pharyngeal epithelial cells. Mol Microbiol.  
340 2007;64(1):111-24.
- 341 25. Santos LS, Sant'anna LO, Ramos JN, Ladeira EM, Stavracakis-Peixoto R, Borges LL,  
342 et al. Diphtheria outbreak in Maranhao, Brazil: microbiological, clinical and epidemiological  
343 aspects. Epidemiol Infect. 2015;143(4):791-8.
- 344 26. Kneen R, Pham NG, Solomon T, Tran TM, Nguyen TT, Tran BL, et al. Penicillin vs.  
345 erythromycin in the treatment of diphtheria. Clinical infectious diseases : an official  
346 publication of the Infectious Diseases Society of America. 1998;27(4):845-50.
- 347 27. Mina NV, Burdz T, Wiebe D, Rai JS, Rahim T, Shing F, et al. Canada's first case of a  
348 multidrug-resistant *Corynebacterium diphtheriae* strain, isolated from a skin abscess. Journal  
349 of clinical microbiology. 2011;49(11):4003-5.

- 350 28. FitzGerald RP, Rosser AJ, Perera DN. Non-toxigenic penicillin-resistant cutaneous *C.*  
 351 *diphtheriae* infection: a case report and review of the literature. J Infect Public Health.  
 352 2015;8(1):98-100.  
 353 29. Sheldon JR, Heinrichs DE. Recent developments in understanding the iron acquisition  
 354 strategies of gram positive pathogens. FEMS Microbiol Rev. 2015;39(4):592-630.
- 355

356 **Table 1:** *C. diphtheriae* strains analysed in this study.

| Isolate | Biotype       | Year isolated | Origin                   | Sequence Type |
|---------|---------------|---------------|--------------------------|---------------|
| 3322    | <i>gravis</i> | 2007          | Cutaneous (foot)         | 239           |
| 2347    | <i>gravis</i> | 2007          | Blood                    | 122           |
| 2235    | <i>mitis</i>  | 2008          | Cutaneous (leg)          | 86            |
| 3846    | <i>gravis</i> | 2009          | Respiratory              | New**         |
| 2682    | <i>gravis</i> | 2012          | Blood                    | 122           |
| 1138    | <i>mitis</i>  | 2012          | Cutaneous (leg)          | New**         |
| 4705    | <i>mitis</i>  | 2012          | Cutaneous (site unknown) | New**         |
| 4447    | <i>gravis</i> | 2012          | Respiratory              | 32            |
| 548     | <i>mitis</i>  | 2012          | Cutaneous (site unknown) | New**         |
| 2686    | <i>gravis</i> | 2013          | Respiratory              | 32            |
| 3876    | <i>gravis</i> | 2013          | Cutaneous (leg)          | 240           |
| 3967    | <i>mitis</i>  | 2013          | Cutaneous (site unknown) | New**         |
| 4089    | <i>gravis</i> | 2014          | Blood                    | New**         |
| 4170    | <i>mitis</i>  | 2014          | Cutaneous (leg)          | New**         |
| 3590    | <i>mitis</i>  | 2014          | Cutaneous (foot)         | New**         |
| 2379    | <i>mitis</i>  | 2014          | Cutaneous (foot)         | 259           |
| 4867    | <i>mitis</i>  | 2014          | Cutaneous (hand)         | New**         |
| 4491    | <i>mitis</i>  | 2014          | Cutaneous (site unknown) | New**         |
| 4650    | <i>mitis</i>  | 2014          | Cutaneous (site unknown) | New**         |
| 2245    | <i>mitis</i>  | 2014          | Cutaneous (site unknown) | New**         |
| 4218    | <i>gravis</i> | 2014          | Respiratory              | 32            |
| 4526    | <i>gravis</i> | 2014          | Respiratory              | New**         |
| 4711    | <i>gravis</i> | 2014          | Respiratory              | New**         |
| 2628    | <i>gravis</i> | 2014          | Cutaneous (arm)          | New**         |
| 4179    | <i>mitis</i>  | 2014          | Cutaneous (leg)          | New**         |

|           |               |      |                                                  |       |
|-----------|---------------|------|--------------------------------------------------|-------|
| 2510      | <i>mitis</i>  | 2014 | Cutaneous (site unknown)                         | New** |
| 1425      | <i>mitis</i>  | 2014 | Cutaneous (leg)                                  | 20    |
| 2349      | <i>gravis</i> | 2014 | Cutaneous (site unknown)                         | 147   |
| 257       | <i>mitis</i>  | 2015 | Cutaneous (site unknown)                         | New** |
| 2562*     | <i>gravis</i> | 2015 | Cutaneous (foot)                                 | 120   |
| 5007*     | <i>gravis</i> | 2015 | Cutaneous (site unknown)                         | 59    |
| 4435      | <i>gravis</i> | 2015 | Cutaneous (site unknown)                         | New** |
| 4442      | <i>mitis</i>  | 2015 | Cutaneous (site unknown)                         | New** |
| 4801      | <i>mitis</i>  | 2015 | Cutaneous (site unknown)                         | New** |
| 2352      | <i>gravis</i> | 2015 | Cutaneous (leg)                                  | New** |
| 2767A     | <i>mitis</i>  | 2015 | Cutaneous (ankle)                                | New** |
| 2767B*    | <i>gravis</i> | 2015 | Cutaneous (ankle)                                | 381   |
| 4455      | <i>mitis</i>  | 2015 | Cutaneous (site unknown)                         | New** |
| 4375      | <i>mitis</i>  | 2015 | Cutaneous (site unknown)                         | New** |
| 5239      | <i>mitis</i>  | 2015 | Cutaneous (penile ulcer,<br>underlying syphilis) | 6     |
| 5117      | <i>mitis</i>  | 2015 | Cutaneous (site unknown)                         | New** |
| 3870      | <i>mitis</i>  | 2015 | Cutaneous (site unknown)                         | 5     |
| 3888      | <i>gravis</i> | 2016 | Cutaneous (wound<br>unknown site)                | 240   |
| 3067      | <i>mitis</i>  | 2016 | Cutaneous                                        | New** |
| 993       | <i>mitis</i>  | 2016 | Cutaneous (foot)                                 | New** |
| 1436      | <i>mitis</i>  | 2016 | Cutaneous                                        | New** |
| 4809      | <i>mitis</i>  | 2016 | Cutaneous (penis,<br>circumcision wound)         | New** |
| 1405      | <i>mitis</i>  | 2016 | Cutaneous (site unknown)                         | New** |
| ATCC13812 | <i>gravis</i> | 1896 | Respiratory                                      | 44    |
| ATCC27010 | <i>mitis</i>  | 1954 | Respiratory                                      | 26    |

357 Note: \*denotes toxin positive strains;

358 \*\*all new sequence types are unique (see Supplementary Table 1).

359



360 **Figures**

361 **Figure 1:** Maximum likelihood tree based on SNP detection of reads mapped to reference  
362 NCTC13129. Branch lengths correspond to numbers of nucleotide substitutions per site. The  
363 heatmap shows *spa* gene clusters when compared to the reference NCTC11329 with high  
364 homology shown in yellow, absence or poor homology shown in blue.

365

366 **Figure 2: The pan genome with core genome phylogenetic tree (i) or accessory tree (ii).**  
367 The top panel (A) shows the contigs inferred from the pan-genome with ordering according  
368 to pan-genome content. The middle panel (B) displays presence (blue) or absence (white) of  
369 blocks relative to genes and contigs in the pangenome. The phylogenetic tree (C) displays  
370 phylogeny based on the core (i) or accessory (ii) genome.

371

372 **Figure 3.** The type 1 PKS cluster of *C. diphtheriae*. The collagen binding protein is indicated  
373 by the red circle and corresponds to the same green gene in each cluster. The homology of the  
374 cluster is indicated for a selection of strains with the closest homology across the cluster.

375

376 **Supplementary table 1:** The allele and ST designations for *C. diphtheriae* genomes





bioRxiv preprint doi: <https://doi.org/10.1101/143800>; this version posted May 30, 2017. The copyright holder for this preprint (which was not certified by peer review) is the author/funder, who has granted bioRxiv a license to display the preprint in perpetuity. It is made available under aCC-BY-NC-ND 4.0 International license.

**ii**



Type 1 PKS Cluster

Collagen binding protein



*C. diphtheriae* bv. *mitis* str. NC03529 (43% of genes show similarity)



*C. diphtheriae* PW8, complete genome. (43% of genes show similarity)



*C. diphtheriae* VA01, complete genome. (44% of genes show similarity)



*C. diphtheriae* C7 (beta), complete genome. (44% of genes show similarity)



*C. diphtheriae* 31A, complete genome. (43% of genes show similarity)



*C. diphtheriae* INCA 402, complete genome. (41% of genes show similarity)



*C. diphtheriae* HC04, complete genome. (43% of genes show similarity)



*C. diphtheriae* CDCE 8392, complete genome. (41% of genes show similarity)



*C. diphtheriae* bv. *intermedius* str. NCTC 5011 (41% of genes show similarity)



*C. diphtheriae* HC01, complete genome. (41% of genes show similarity)



bioRxiv preprint doi: <https://doi.org/10.1101/148890>; this version posted May 30, 2017. The copyright holder for this preprint (which was not certified by peer review) is the author/funder, who has granted bioRxiv a license to display the preprint in perpetuity. It is made available under aCC-BY-NC-ND 4.0 International license.
